# Supplementary material for: The Association of Attending Physicians’ Publications and Patients’ Readmission Rates: Evidence from Tertiary Hospitals in China Using a Retrospective Data Analysis
Source: MDPI journal article supplement (doi:10.3390/ijerph19159760), 2022-08-08
Supplement: s1 [file s1]

## Supplementary Table

**Table S1: Physicians' First-Author Publications**

| Publication Type         | Internist %     | Surgeon % |
|--------------------------|-----------------|-----------|
|                          | Physician Level |           |
| Any publication          | 37.77           | 41.22     |
| Average impact factor 3+ | 17.65           | 16.10     |
| Average impact factor 5+ | 4.34            | 3.70      |
| Any clinical study       | 23.04           | 24.62     |
| Average impact factor 3+ | 4.79            | 3.25      |
| Average impact factor 5+ | 1.25            | 0.73      |
| Any basic science study  | 30.84           | 34.04     |
| Average impact factor 3+ | 11.82           | 12.00     |
| Average impact factor 5+ | 3.12            | 3.20      |
| <i>N</i>                 | 4,011           | 1,783     |
| Visit Level              |                 |           |
| Any publication          | 34.05           | 36.56     |
| Average impact factor 3+ | 15.09           | 12.98     |
| Average impact factor 5+ | 4.06            | 3.11      |
| Any clinical study       | 20.64           | 22.45     |
| Average impact factor 3+ | 3.97            | 2.30      |
| Average impact factor 5+ | 1.08            | 0.71      |
| Any basic science study  | 28.17           | 29.39     |
| Average impact factor 3+ | 10.06           | 10.19     |
| Average impact factor 5+ | 3.24            | 2.45      |
| <i>N</i>                 | 84,954          | 27,011    |

*Note.* Physician-level data provide information on the characteristics of the physician. However, because we conducted the analysis at the visit level, we also provide information on characteristics of the physician at the visit level.

**Table S2: Descriptive Statistics-Patient Characteristics**

| Characteristic                         | Internist (n=4011) | Surgeon (n=1783) |
|----------------------------------------|--------------------|------------------|
| Hospitalizations, n                    | 84,954             | 27,011           |
| Female, %                              | 52.53              | 50.09            |
| Age, mean (sd)                         | 59.33 (16.91)      | 56.47 (17.37)    |
| Length of stay (day) , mean (sd)       | 9.06 (6.81)        | 7.75 (6.91)      |
| Number of outpatient visits, mean (sd) | 23.67 (25.85)      | 21.86 (25.59)    |
| Residence, %                           |                    |                  |
| Rural                                  | 13.05              | 16.26            |
| Urban                                  | 85.44              | 82.06            |
| Other                                  | 1.53               | 1.68             |
| Position, %                            |                    |                  |
| Worker                                 | 60.39              | 61.77            |
| Enterprise manager                     | 16.06              | 15.89            |
| Freelancer                             | 17.90              | 17.42            |
| Other                                  | 5.17               | 5.65             |
| Number of chronic diseases, %          |                    |                  |
| None                                   | 39.40              | 55.17            |
| One                                    | 21.73              | 19.72            |
| Multiple                               | 38.87              | 25.11            |

*Note.* Standard deviations are shown in parentheses.

**Table S3: Association Between Physicians' First-Author Publication and Patients' 30-Day Readmission Rates (Using Non-logistic Regression)**

| Publication Type         | Model 1                  |          | Model 2                  |          |
|--------------------------|--------------------------|----------|--------------------------|----------|
|                          | Adjusted Risk Difference | <i>p</i> | Adjusted Risk Difference | <i>p</i> |
| Panel A. Internist       |                          |          |                          |          |
| Any publication          | -0.005                   |          | -0.001                   |          |
|                          | [-0.015, 0.005]          | .302     | [-0.010, 0.008]          | .783     |
| Average impact factor 3+ | -0.013**                 |          | -0.008                   |          |
|                          | [-0.024, -0.002]         | .020     | [-0.019, 0.002]          | .125     |
| Average impact factor 5+ | -0.025***                |          | -0.018**                 |          |
|                          | [-0.042, -0.007]         | .006     | [-0.035, -0.002]         | .028     |
| Any clinical study       | 0.000                    |          | 0.001                    |          |
|                          | [-0.012, 0.012]          | .959     | [-0.010, 0.012]          | .819     |
| Average impact factor 3+ | -0.032***                |          | -0.023**                 |          |
|                          | [-0.050, -0.014]         | .001     | [-0.042, -0.005]         | .012     |
| Average impact factor 5+ | -0.043***                |          | -0.038***                |          |
|                          | [-0.071, -0.015]         | .002     | [-0.067, -0.010]         | .008     |
| Any basic science study  | -0.008                   |          | -0.005                   |          |
|                          | [-0.019, 0.002]          | .108     | [-0.014, 0.004]          | .259     |
| Average impact factor 3+ | 0.001                    |          | 0.001                    |          |
|                          | [-0.015, 0.017]          | .897     | [-0.013, 0.014]          | .918     |
| Average impact factor 5+ | -0.009                   |          | -0.004                   |          |
|                          | [-0.031, 0.012]          | .391     | [-0.024, 0.015]          | .663     |
| Panel B. Surgeon         |                          |          |                          |          |
| Any publication          | 0.007                    |          | 0.012*                   |          |
|                          | [-0.007, 0.021]          | .328     | [-0.001, 0.026]          | .078     |
| Average impact factor 3+ | 0.008                    |          | 0.008                    |          |
|                          | [-0.010, 0.026]          | .405     | [-0.009, 0.026]          | .359     |
| Average impact factor 5+ | -0.016                   |          | -0.010                   |          |
|                          | [-0.040, 0.008]          | .186     | [-0.035, 0.014]          | .405     |
| Any clinical study       | -0.002                   |          | 0.004                    |          |
|                          | [-0.021, 0.017]          | .868     | [-0.013, 0.021]          | .632     |
| Average impact factor 3+ | -0.048***                |          | -0.039***                |          |
|                          | [-0.075, -0.020]         | .001     | [-0.067, -0.011]         | .006     |
| Average impact factor 5+ | -0.084***                |          | -0.077***                |          |
|                          | [-0.134, -0.034]         | .001     | [-0.128, -0.027]         | .003     |
| Any basic science study  | 0.005                    |          | 0.009                    |          |
|                          | [-0.007, 0.018]          | .427     | [-0.004, 0.021]          | .166     |
| Average impact factor 3+ | 0.023**                  |          | 0.023**                  |          |
|                          | [0.004, 0.043]           | .017     | [0.003, 0.042]           | .025     |
| Average impact factor 5+ | -0.001                   |          | 0.003                    |          |
|                          | [-0.024, 0.022]          | .946     | [-0.022, 0.027]          | .839     |

*Note.* Standard deviations are shown in parentheses, and 95% confidence intervals are shown in brackets. Model 1 adjusts for patient characteristics, and Model 2 further adjusts for hospital fixed effects.

\**p* < .10. \*\**p* < .05. \*\*\**p* < .01.

**Table S4: Association Between Physicians' First-Author Publications and Patients' 30-Day Readmission Rates (Without Control Variables)**

| Publication Type         | Model 1             |          | Model 2             |          |
|--------------------------|---------------------|----------|---------------------|----------|
|                          | Adjusted Odds Ratio | <i>p</i> | Adjusted Odds Ratio | <i>p</i> |
| Panel A. Internist       |                     |          |                     |          |
| Any publication          | 0.952               |          | 0.989               |          |
|                          | [0.886, 1.023]      | .178     | [0.928, 1.054]      | .730     |
| Average impact factor 3+ | 0.895***            |          | 0.953               |          |
|                          | [0.825, 0.970]      | .007     | [0.882, 1.030]      | .223     |
| Average impact factor 5+ | 0.824***            |          | 0.888*              |          |
|                          | [0.721, 0.943]      | .005     | [0.784, 1.006]      | .061     |
| Any clinical study       | 0.988               |          | 1.014               |          |
|                          | [0.905, 1.080]      | .797     | [0.939, 1.095]      | .724     |
| Average impact factor 3+ | 0.761***            |          | 0.850**             |          |
|                          | [0.663, 0.873]      | < .001   | [0.739, 0.978]      | .023     |
| Average impact factor 5+ | 0.718***            |          | 0.781**             |          |
|                          | [0.581, 0.888]      | .002     | [0.633, 0.962]      | .020     |
| Any basic science study  | 0.934*              |          | 0.960               |          |
|                          | [0.866, 1.008]      | .078     | [0.899, 1.025]      | .223     |
| Average impact factor 3+ | 0.994               |          | 1.008               |          |
|                          | [0.883, 1.119]      | .918     | [0.916, 1.108]      | .875     |
| Average impact factor 5+ | 0.928               |          | 0.967               |          |
|                          | [0.794, 1.086]      | .353     | [0.830, 1.127]      | .671     |
| Panel B. Surgeon         |                     |          |                     |          |
| Any publication          | 1.051               |          | 1.105*              |          |
|                          | [0.934, 1.184]      | .407     | [0.998, 1.224]      | .054     |
| Average impact factor 3+ | 1.067               |          | 1.086               |          |
|                          | [0.917, 1.241]      | .403     | [0.945, 1.248]      | .245     |
| Average impact factor 5+ | 0.852               |          | 0.936               |          |
|                          | [0.661, 1.098]      | .214     | [0.735, 1.190]      | .588     |
| Any clinical study       | 0.980               |          | 1.024               |          |
|                          | [0.830, 1.156]      | .810     | [0.902, 1.163]      | .710     |
| Average impact factor 3+ | 0.619***            |          | 0.693**             |          |
|                          | [0.455, 0.842]      | .002     | [0.516, 0.932]      | .015     |
| Average impact factor 5+ | 0.472***            |          | 0.590*              |          |
|                          | [0.272, 0.820]      | .008     | [0.332, 1.047]      | .071     |
| Any basic science study  | 1.048               |          | 1.096*              |          |
|                          | [0.939, 1.171]      | .403     | [0.992, 1.211]      | .073     |
| Average impact factor 3+ | 1.231***            |          | 1.223**             |          |
|                          | [1.052, 1.440]      | .010     | [1.048, 1.429]      | .011     |
| Average impact factor 5+ | 0.990               |          | 0.995               |          |
|                          | [0.782, 1.253]      | .930     | [0.774, 1.279]      | .967     |

*Note.* Standard deviations are shown in parentheses, and 95% confidence intervals are shown in brackets. Model 1 didn't include any control, and Model 2 adjusts for hospital fixed effects.

\* $p < .10$ . \*\* $p < .05$ . \*\*\* $p < .01$ .

**Table S5: Association Between Physicians' First-Author Publications and Patients' 60-Day Readmission Rates**

| Publication Type         | Publication    |                | Model 1                    |          | Model 2                   |          |
|--------------------------|----------------|----------------|----------------------------|----------|---------------------------|----------|
|                          | Yes            | No             | Adjusted Odds Ratio        | <i>p</i> | Adjusted Odds Ratio       | <i>p</i> |
| Panel A. Internist       |                |                |                            |          |                           |          |
| Any publication          | 0.23<br>(0.42) | 0.25<br>(0.43) | 0.962<br>[0.905, 1.022]    | .212     | 0.985<br>[0.931, 1.043]   | .615     |
| Average impact factor 3+ | 0.22<br>(0.42) | 0.25<br>(0.43) | 0.924**<br>[0.859, 0.994]  | .033     | 0.952<br>[0.889, 1.020]   | .161     |
| Average impact factor 5+ | 0.22<br>(0.41) | 0.24<br>(0.43) | 0.901*<br>[0.797, 1.019]   | .098     | 0.943<br>[0.843, 1.054]   | .301     |
| Any clinical study       | 0.24<br>(0.42) | 0.25<br>(0.43) | 0.990<br>[0.919, 1.067]    | .798     | 0.997<br>[0.931, 1.068]   | .930     |
| Average impact factor 3+ | 0.19<br>(0.39) | 0.25<br>(0.43) | 0.818***<br>[0.720, 0.929] | .002     | 0.879**<br>[0.780, 0.990] | .034     |
| Average impact factor 5+ | 0.19<br>(0.39) | 0.24<br>(0.43) | 0.746***<br>[0.618, 0.901] | .002     | 0.791**<br>[0.660, 0.949] | .011     |
| Any basic science study  | 0.22<br>(0.42) | 0.25<br>(0.43) | 0.939*<br>[0.880, 1.001]   | .055     | 0.955<br>[0.900, 1.013]   | .125     |
| Average impact factor 3+ | 0.25<br>(0.43) | 0.24<br>(0.43) | 1.014<br>[0.917, 1.120]    | .791     | 1.004<br>[0.920, 1.096]   | .923     |
| Average impact factor 5+ | 0.23<br>(0.42) | 0.24<br>(0.43) | 1.019<br>[0.879, 1.181]    | .805     | 1.037<br>[0.903, 1.192]   | .606     |
| Panel B. Surgeon         |                |                |                            |          |                           |          |
| Any publication          | 0.18<br>(0.38) | 0.17<br>(0.37) | 1.045<br>[0.948, 1.153]    | .373     | 1.102**<br>[1.002, 1.213] | .046     |
| Average impact factor 3+ | 0.18<br>(0.38) | 0.17<br>(0.37) | 1.076<br>[0.926, 1.251]    | .339     | 1.094<br>[0.957, 1.250]   | .188     |
| Average impact factor 5+ | 0.15<br>(0.35) | 0.17<br>(0.38) | 0.889<br>[0.703, 1.124]    | .327     | 0.956<br>[0.763, 1.199]   | .700     |
| Any clinical study       | 0.17<br>(0.38) | 0.17<br>(0.38) | 0.998<br>[0.886, 1.124]    | .971     | 1.053<br>[0.945, 1.174]   | .348     |
| Average impact factor 3+ | 0.14<br>(0.35) | 0.17<br>(0.38) | 0.715**<br>[0.545, 0.939]  | .016     | 0.797*<br>[0.611, 1.040]  | .095     |
| Average impact factor 5+ | 0.13<br>(0.34) | 0.17<br>(0.38) | 0.447***<br>[0.256, 0.779] | .005     | 0.523**<br>[0.291, 0.940] | .03      |
| Any basic science study  | 0.17<br>(0.38) | 0.17<br>(0.38) | 1.057<br>[0.960, 1.164]    | .255     | 1.104**<br>[1.007, 1.211] | .036     |
| Average impact factor 3+ | 0.19<br>(0.39) | 0.17<br>(0.37) | 1.203**<br>[1.022, 1.415]  | .027     | 1.197**<br>[1.033, 1.387] | .017     |
| Average impact factor 5+ | 0.15<br>(0.35) | 0.17<br>(0.38) | 1.014<br>[0.833, 1.235]    | .889     | 1.035<br>[0.836, 1.281]   | .751     |

*Note.* Standard deviations are shown in parentheses, and 95% confidence intervals are shown in brackets. Model 1 adjusts for patient characteristics, and Model 2 further adjusts for hospital fixed effects.

\* $p < .10$ . \*\* $p < .05$ . \*\*\* $p < .01$ .

**Table S6: Association Between Physicians' First-Author Publications and Patients' 30-Day Readmission Rates (Using Additional Controls/Mechanisms)**

| Publication Type         | Model 1             |          | Model 2             |          | Model 3             |          | Model 4             |          | Model 5             |          | Model 6             |          |
|--------------------------|---------------------|----------|---------------------|----------|---------------------|----------|---------------------|----------|---------------------|----------|---------------------|----------|
|                          | Adjusted Odds Ratio | <i>p</i> |
| Panel A. Internist       |                     |          |                     |          |                     |          |                     |          |                     |          |                     |          |
| Any publication          | 0.975               | .458     | 1.002               | .945     | 0.962               | .282     | 0.993               | .832     | 0.995               | .884     | 0.968               | .354     |
|                          | [0.911, 1.043]      |          | [0.941, 1.067]      |          | [0.897, 1.032]      |          | [0.931, 1.059]      |          | [0.934, 1.061]      |          | [0.902, 1.037]      |          |
| Average impact factor 3+ | 1.012               | .780     | 1.022               | .574     | 1.003               | .945     | 1.013               | .738     | 1.012               | .757     | 1.006               | .893     |
|                          | [0.932, 1.098]      |          | [0.948, 1.102]      |          | [0.921, 1.093]      |          | [0.938, 1.095]      |          | [0.937, 1.093]      |          | [0.924, 1.095]      |          |
| Average impact factor 5+ | 0.958               | .232     | 0.976               | .465     | 0.942               | .111     | 0.963               | .270     | 0.967               | .322     | 0.948               | .150     |
|                          | [0.893, 1.028]      |          | [0.915, 1.041]      |          | [0.875, 1.014]      |          | [0.902, 1.029]      |          | [0.906, 1.033]      |          | [0.881, 1.020]      |          |
| Any clinical study       | 0.919**             | .036     | 0.955               | .231     | 0.915**             | .033     | 0.952               | .215     | 0.950               | .196     | 0.918**             | .037     |
|                          | [0.849, 0.994]      |          | [0.885, 1.030]      |          | [0.844, 0.993]      |          | [0.881, 1.029]      |          | [0.880, 1.027]      |          | [0.847, 0.995]      |          |
| Average impact factor 3+ | 0.827***            | .005     | 0.865**             | .022     | 0.816***            | .004     | 0.862**             | .021     | 0.859**             | .016     | 0.820***            | .003     |
|                          | [0.725, 0.944]      |          | [0.765, 0.979]      |          | [0.712, 0.936]      |          | [0.760, 0.977]      |          | [0.760, 0.972]      |          | [0.717, 0.937]      |          |
| Average impact factor 5+ | 0.791***            | .001     | 0.855**             | .024     | 0.790***            | .001     | 0.860**             | .033     | 0.850**             | .020     | 0.787***            | .001     |
|                          | [0.690, 0.907]      |          | [0.747, 0.979]      |          | [0.685, 0.911]      |          | [0.749, 0.988]      |          | [0.740, 0.975]      |          | [0.684, 0.906]      |          |
| Any basic science study  | 0.698***            | .001     | 0.740***            | .007     | 0.695***            | .001     | 0.747***            | .009     | 0.747***            | .008     | 0.700***            | .001     |
|                          | [0.564, 0.864]      |          | [0.595, 0.919]      |          | [0.563, 0.857]      |          | [0.599, 0.931]      |          | [0.602, 0.926]      |          | [0.571, 0.859]      |          |
| Average impact factor 3+ | 1.017               | .769     | 1.015               | .760     | 1.012               | .844     | 1.006               | .897     | 1.007               | .886     | 1.015               | .801     |
|                          | [0.910, 1.136]      |          | [0.923, 1.116]      |          | [0.903, 1.134]      |          | [0.914, 1.108]      |          | [0.915, 1.108]      |          | [0.906, 1.136]      |          |
| Average impact factor 5+ | 0.948               | .506     | 0.968               | .666     | 0.929               | .364     | 0.951               | .514     | 0.951               | .508     | 0.935               | .399     |
|                          | [0.811, 1.109]      |          | [0.834, 1.123]      |          | [0.793, 1.089]      |          | [0.818, 1.106]      |          | [0.819, 1.104]      |          | [0.799, 1.093]      |          |
| Panel B. Surgeon         |                     |          |                     |          |                     |          |                     |          |                     |          |                     |          |
| Any publication          | 1.067               | .273     | 1.095*              | .087     | 1.055               | .359     | 1.055               | .359     | 1.102*              | .066     | 1.070               | .255     |
|                          | [0.950, 1.198]      |          | [0.987, 1.215]      |          | [0.941, 1.182]      |          | [0.941, 1.182]      |          | [0.994, 1.221]      |          | [0.952, 1.203]      |          |
| Average impact factor 3+ | 1.000               | .998     | 1.030               | .655     | 0.988               | .880     | 0.988               | .880     | 1.024               | .718     | 0.995               | .954     |
|                          | [0.850, 1.177]      |          | [0.904, 1.175]      |          | [0.842, 1.158]      |          | [0.842, 1.158]      |          | [0.900, 1.165]      |          | [0.848, 1.168]      |          |
| Average impact factor 5+ | 1.050               | .364     | 1.072               | .165     | 1.040               | .460     | 1.040               | .460     | 1.077               | .136     | 1.054               | .309     |
|                          | [0.945, 1.166]      |          | [0.972, 1.183]      |          | [0.936, 1.156]      |          | [0.936, 1.156]      |          | [0.977, 1.188]      |          | [0.952, 1.168]      |          |
| Any clinical study       | 1.078               | .308     | 1.071               | .337     | 1.071               | .355     | 1.071               | .355     | 1.086               | .252     | 1.088               | .248     |
|                          | [0.933, 1.247]      |          | [0.931, 1.232]      |          | [0.926, 1.239]      |          | [0.926, 1.239]      |          | [0.943, 1.251]      |          | [0.943, 1.256]      |          |
| Average impact factor 3+ | 0.869               | .222     | 0.910               | .418     | 0.846               | .156     | 0.846               | .156     | 0.915               | .439     | 0.874               | .245     |
|                          | [0.693, 1.089]      |          | [0.723, 1.144]      |          | [0.672, 1.066]      |          | [0.672, 1.066]      |          | [0.729, 1.147]      |          | [0.696, 1.097]      |          |
| Average impact factor 5+ | 1.235***            | .005     | 1.207**             | .018     | 1.236***            | .005     | 1.236***            | .005     | 1.232***            | .009     | 1.252***            | .003     |
|                          | [1.064, 1.433]      |          | [1.033, 1.410]      |          | [1.065, 1.435]      |          | [1.065, 1.435]      |          | [1.053, 1.441]      |          | [1.080, 1.451]      |          |
| Any basic science study  | 0.491***            | .009     | 0.531**             | .028     | 0.467***            | .005     | 0.467***            | .005     | 0.547**             | .034     | 0.497**             | .010     |
|                          | [0.289, 0.834]      |          | [0.302, 0.933]      |          | [0.273, 0.798]      |          | [0.273, 0.798]      |          | [0.313, 0.956]      |          | [0.291, 0.848]      |          |
| Average impact factor 3+ | 0.654***            | .004     | 0.702**             | .017     | 0.640***            | .003     | 0.640***            | .003     | 0.711**             | .021     | 0.659***            | .005     |
|                          | [0.490, 0.871]      |          | [0.525, 0.940]      |          | [0.478, 0.856]      |          | [0.478, 0.856]      |          | [0.532, 0.949]      |          | [0.494, 0.879]      |          |
| Average impact factor 5+ | 0.970               | .789     | 0.981               | .872     | 0.961               | .720     | 0.961               | .720     | 0.992               | .943     | 0.984               | .888     |
|                          | [0.778, 1.210]      |          | [0.775, 1.241]      |          | [0.771, 1.197]      |          | [0.771, 1.197]      |          | [0.787, 1.249]      |          | [0.792, 1.224]      |          |
| Patient characteristics  | X                   |          | X                   |          | X                   |          | X                   |          | X                   |          | X                   |          |
| Hospital fixed effects   |                     |          | X                   |          |                     |          | X                   |          |                     |          | X                   |          |
| Total fee                |                     |          |                     |          | X                   |          | X                   |          |                     |          |                     |          |

Note. Standard deviations are shown in parentheses, and 95% confidence intervals are shown in brackets.

\* $p < .10$ . \*\* $p < .05$ . \*\*\* $p < .01$ .

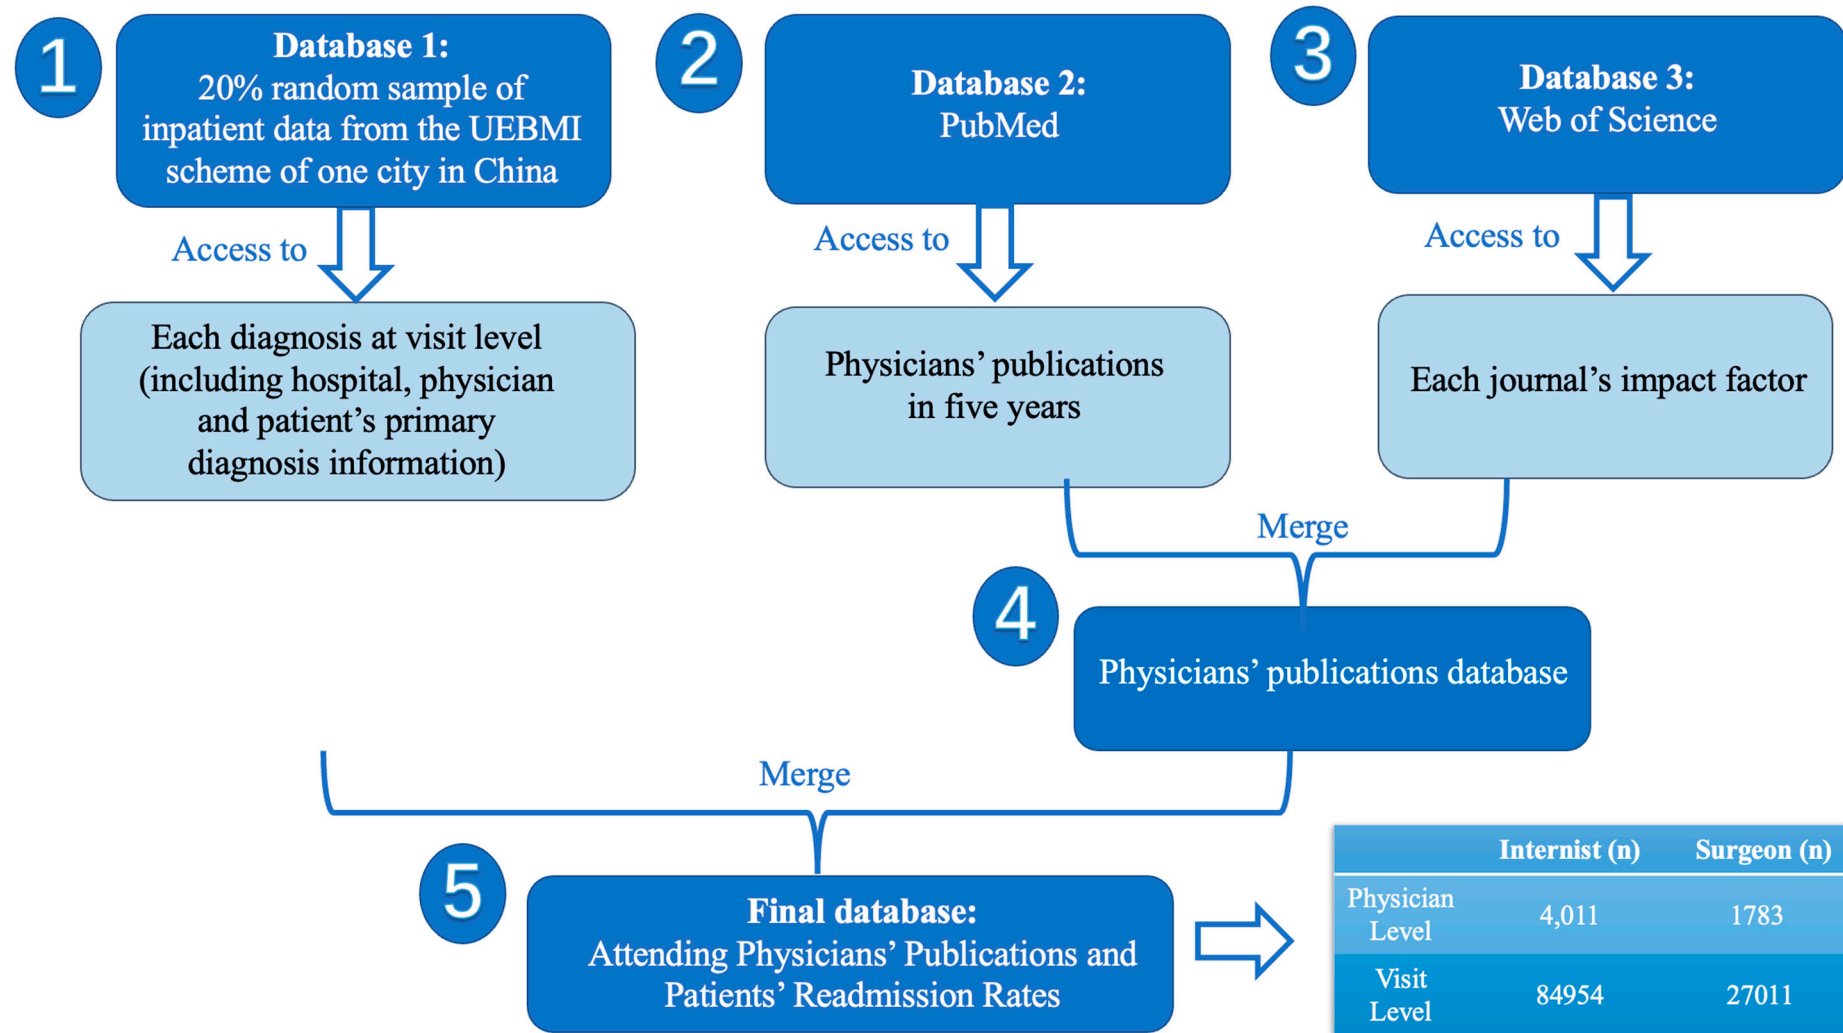

Figure S1. Data linkage process.
